# Supplementary material
Source: Research Square preprint supplement (doi:10.21203/rs.3.rs-10197859/v1)

**Supplementary information**

1. **Supplementary Figures**

**
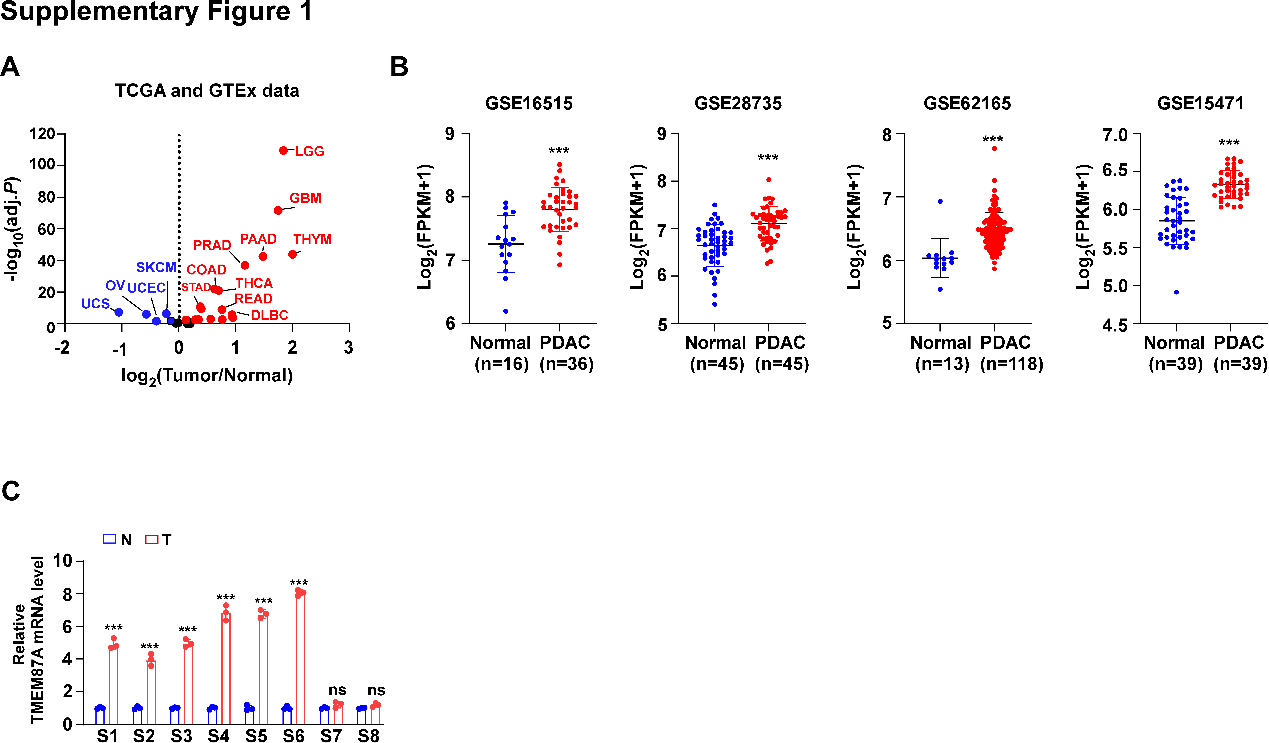
**

**Supplementary Fig. 1. Up-regulation of TMEM87A correlates with poor prognosis of PDAC.**

**(A)** GEPIA database analysis of relative mRNA expression of TMEM87A in pan-cancer. **(B)** GEO dataset (GSE16515, GSE28735, GSE62165, and GSE15471) analysis of TMEM87A mRNA expression in PDAC compared to normal tissues. **(C)** Quantitative PCR analyses of *TMEM87A* mRNA expression in 8 PDAC tissue samples and their paired adjacent normal pancreatic tissue samples. *GAPDH* was used as the loading control. Data are the mean ± SD (***p < 0.001, ns, not significant.). Statistical analysis was performed using an unpaired two‐tailed Student's t‐test (**B**), or a two‐way ANOVA, followed by Tukey's test (**C**).


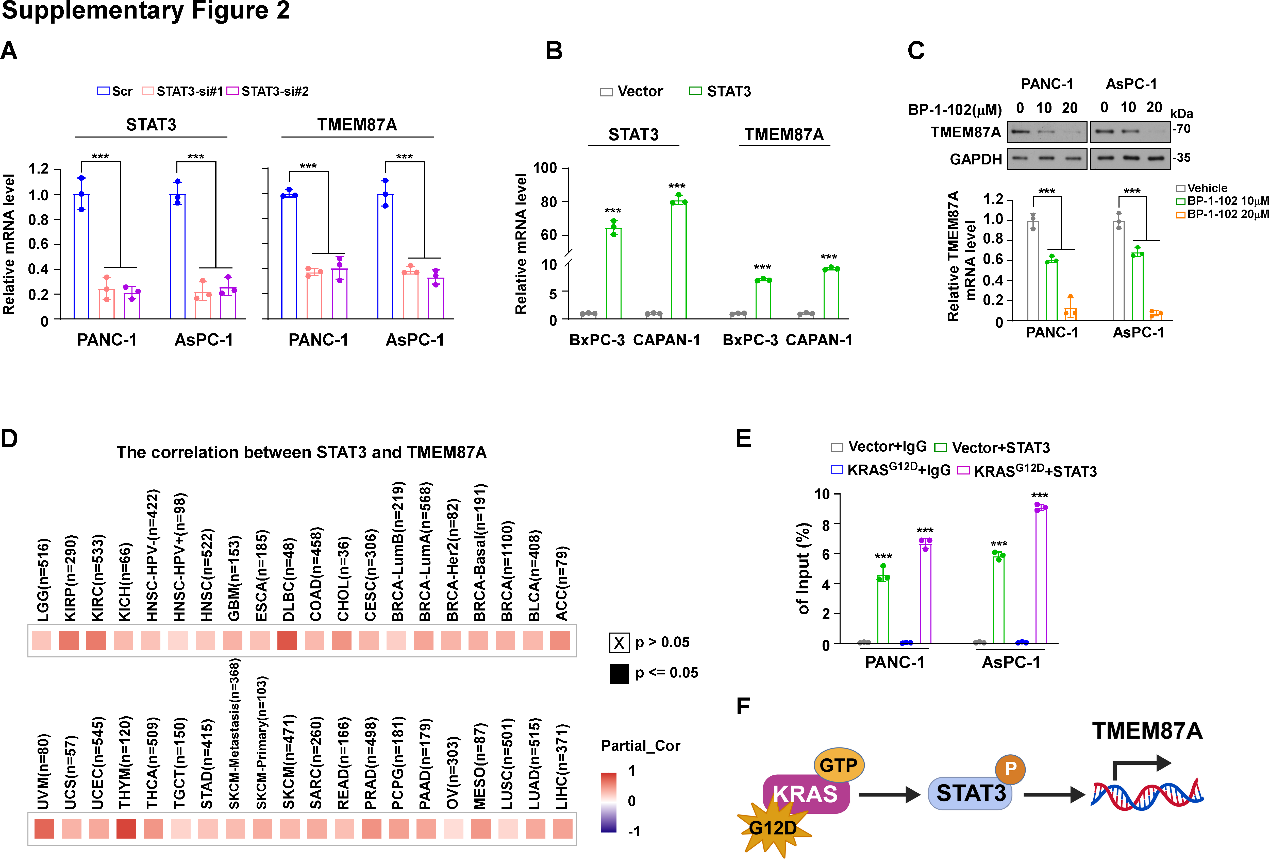


**Supplementary Fig. 2. KRAS mutations induce the accumulation of TMEM87A in pancreatic cancer via STAT3.**

**(A)** Quantitative PCR analyses of *STAT3* and *TMEM87A* mRNA expression in PANC-1 and AsPC-1 cells transfected with STAT3 siRNA. *GAPDH* was used as the loading control. **(B)** Quantitative PCR analyses of STAT3 and TMEM87A mRNA expression in HPNE and BxPC-3 cells transfected with STAT3. *GAPDH* was used as the loading control. **(C)** IB (top) and quantitative PCR (bottom) analyses of TMEM87A expression in PANC-1 and AsPC-1 cells treated with different concentrations of STAT3 inhibitor (BP-1-102). GAPDH was used as the loading control. **(D)** The correlation of STAT3 and TMEM87A expression in in various cancer types from TIMER2.0 database. **(E)** ChIP-qPCR assay of TMEM87A by using the IgG or STAT3 antibodies in PANC-1 and AsPC-1 cells infected with Vector or KRASG12D or STAT3. **(F)** Model depicting the mechanism that KRAS mutations induce TMEM87A upregulation through activation of STAT3.Data are the mean ± SD of n = 3 (**A-C, E**) biologically independent samples (***p < 0.001, ns, not significant.). Statistical analysis was performed using a two‐way ANOVA, followed by Tukey's test (**A-C, E**).


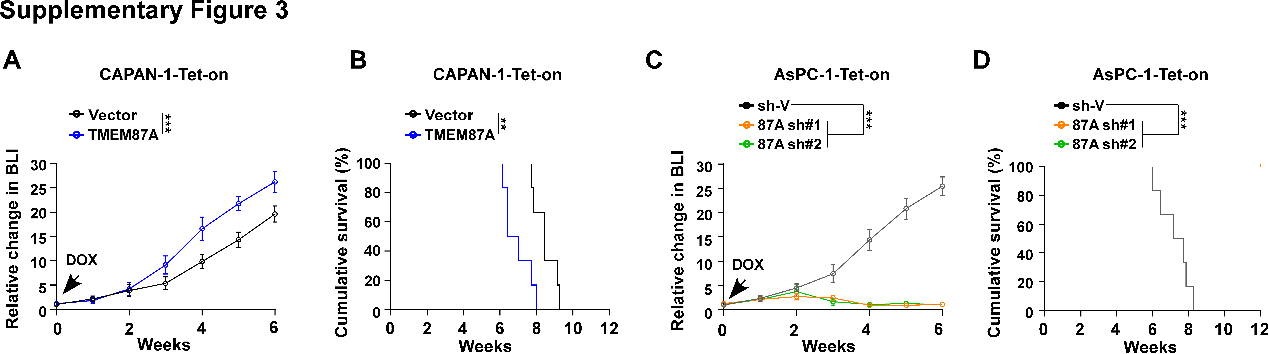


**Supplementary Fig. 3. TMEM87A promotes pancreatic cancer progression.**

**(A)** Relative changes in BLI signal intensities of pancreatic tumours formed by the indicated cells in NOG mice in response to DOX treatment. **(B)** Kaplan–Meier survival curves of the indicated mice. **(C)** Relative changes in BLI signal intensities of pancreatic tumours formed by the indicated cells in NOG mice in response to DOX treatment. **(D)** Kaplan–Meier survival curves of the indicated mice. Data are the mean ± SD of n = 6 (**A-D**) biologically independent samples (**p < 0.01, ***p < 0.001, ns, not significant.). Statistical analysis was performed using a one‐way (ANOVA), followed by Dunnett's test (**A-D**).


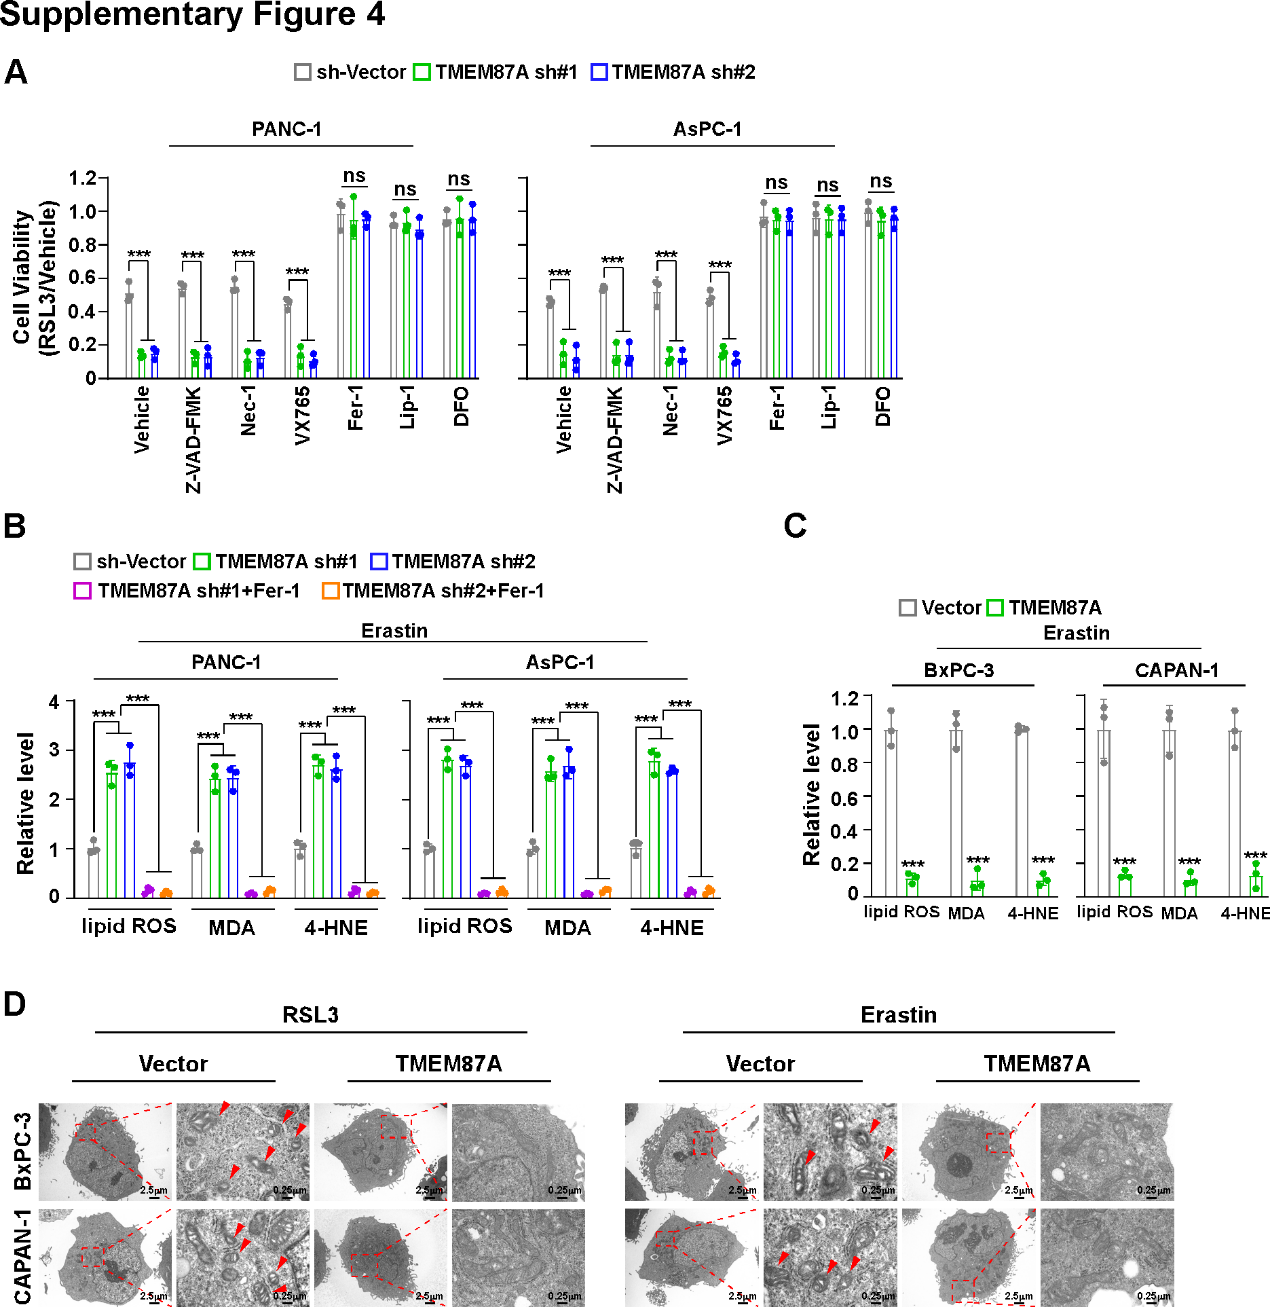


**Supplementary Fig. 4. TMEM87A inhibits ferroptosis.**

**(A)** Cell viability analysis of indicated cells treated with RSL3 (1 µM) plus vehicle, Z‐VAD‐FMK (10 µM), Nec‐1 (10 µM), VX765 (10 µM), Fer‐1 (2 µM), Lip‐1 (0.2 µM), or DFO (100 µM). **(B)** Relative lipid ROS, MDA, and 4-HNE levels in indicated PANC-1 and AsCP-1 cells treated with Erastin (5 μM) for 10 h. **(C)** Relative lipid ROS, MDA, and 4-HNE levels in indicated BxPC-3 and CAPAN-1 cells treated with Erastin (5 μM) for 10 h. **(D)** Transmission electron microscopy images showing mitochondrial crests in indicated BxPC-3 and CAPAN-1 cells treated with Erastin (5 μM) and RSL3 (1 μM) for 10 h, respectively. Scale bars: 2.5 μm (left) and 0.25 μm (right). Data are the mean ± SD of n = 3 (**A-C**) biologically independent samples (***p < 0.001, ns, not significant.). Statistical analysis was performed using a two‐way ANOVA, followed by Tukey's test (**A-C**).


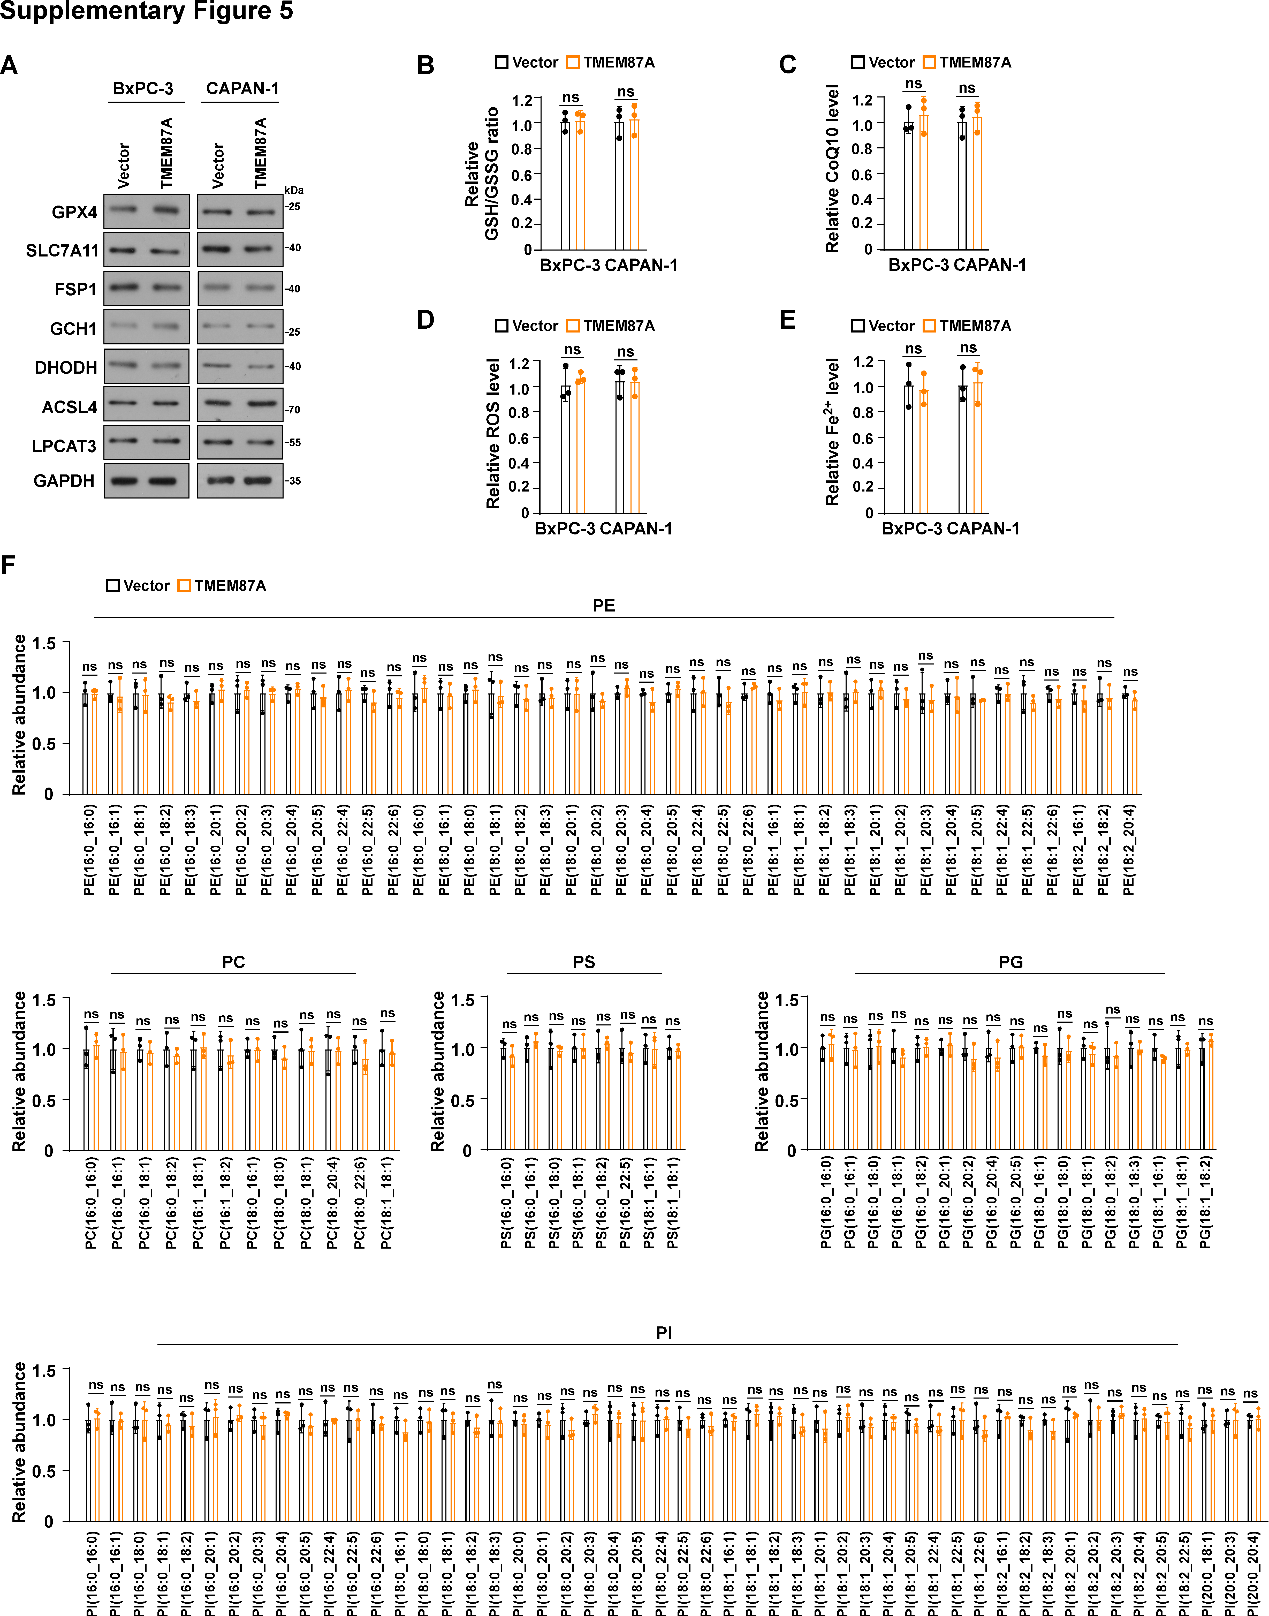


**Supplementary Fig. 5. TMEM87A Inhibits Ferroptosis by Upregulating EBP-Mediated 7-DHC Accumulation.**

**(A)** IB analysis of GPX4, SLC7A11, FSP1, GCH1, DHODH, ACSL4, and LPCAT3 expression in the indicated BxPC-3 and CAPAN-1 cells. GAPDH was used as a loading control. **(B-E)** Relative GSH/GSSG ratio (**B**), CoQ10 (**C**), ROS (**D**) and Fe2+ (**E**)levels in indicated BxPC-3 and CAPAN-1 cells. **F** Relative abundance of indicated phospholipid species, including phosphatidylethanolamine (PE), phosphatidylcholine (PC), phosphatidylserine (PS), phosphatidylglycerol (PG), and phosphatidylinositol (PI) in the indicated cells. Data are the mean ± SD of n = 3 (**B-F**) biologically independent samples (***p < 0.001, ns, not significant.). Statistical analysis was performed using a two‐way ANOVA, followed by Tukey's test (**B-F**).


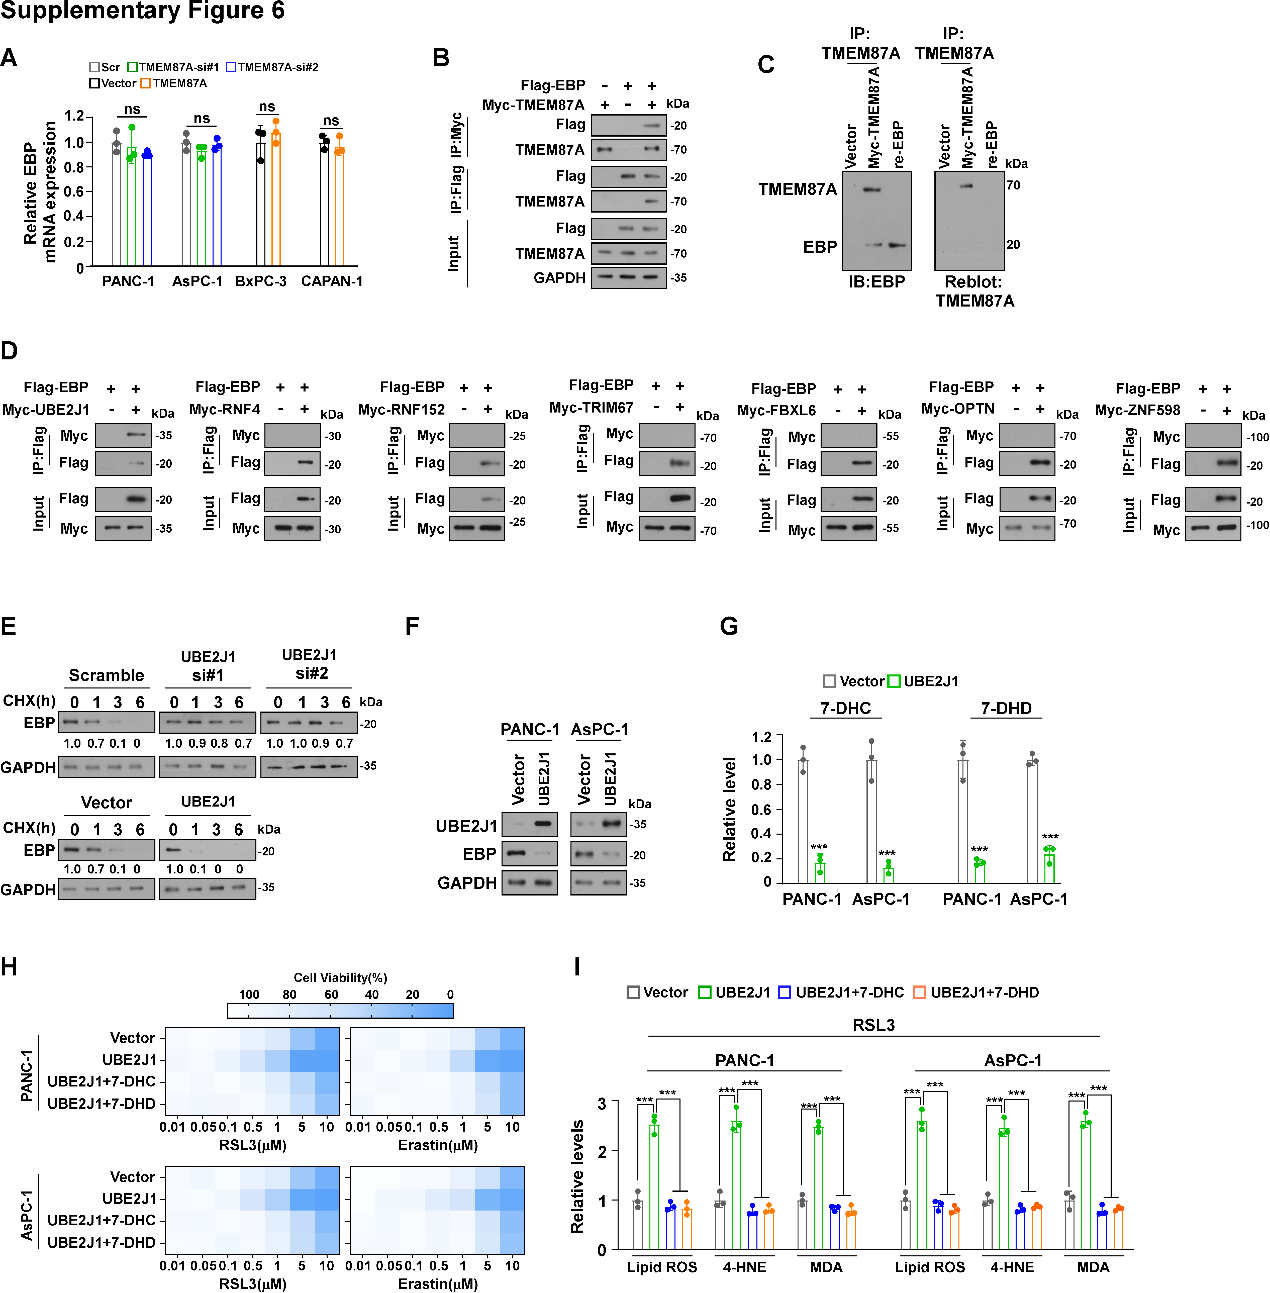


**Supplementary Fig. 6. TMEM87A increases protein stability of EBP and inhibits its ubiquitination.**

**(A)** Quantitative PCR analyses of *EBP* mRNA expression in the indicated PDAC cells. *GAPDH* was used as the loading control. **(B)** IP/IB analysis of interactions of TMEM87A with EBP. **(C)** Far‐western blotting analysis was performed using anti‐Myc antibody‐immunoprecipitated proteins and detected using anti‐EBP or anti‐TMEM87A and then reblotted with anti‐TMEM87A. Recombinant EBP were used as controls. **(D)** IP/IB analysis of interactions of EBP with UBE2J1, or RNF4, or RNF152, or TRIM67, or FBXL6, or OPTN, or ZNF598 in PANC-1 cells. **(E)** CHX chase analysis of EBP half-life in UBE2J1 siRNA -transfected or UBE2J1 overexpressing PANC-1 cells at the indicated timepoints. GAPDH was used as the loading control. **(F)** IP/IB analysis of EBP and UBE2J1 expression in the indicated PDAC cells. **(G)** Relative levels of 7-DHC and 7-DHD in the indicated PDAC cells. **(H)** Cell viability analysis of indicated PANC-1 and AsPC-1 cells treated with different concentrations of RSL3 and Erastin, respectively. **(I)** Relative lipid ROS, MDA, and 4-HNE levels in indicated PANC-1 and AsCP-1 cells treated with RSL3 (1 μM) for 10 h. Data are the mean ± SD of n = 3 (**A, G-I**) biologically independent samples (***p < 0.001, ns, not significant.). Statistical analysis was performed using a two‐way ANOVA, followed by Tukey's test (**A, G-I**).


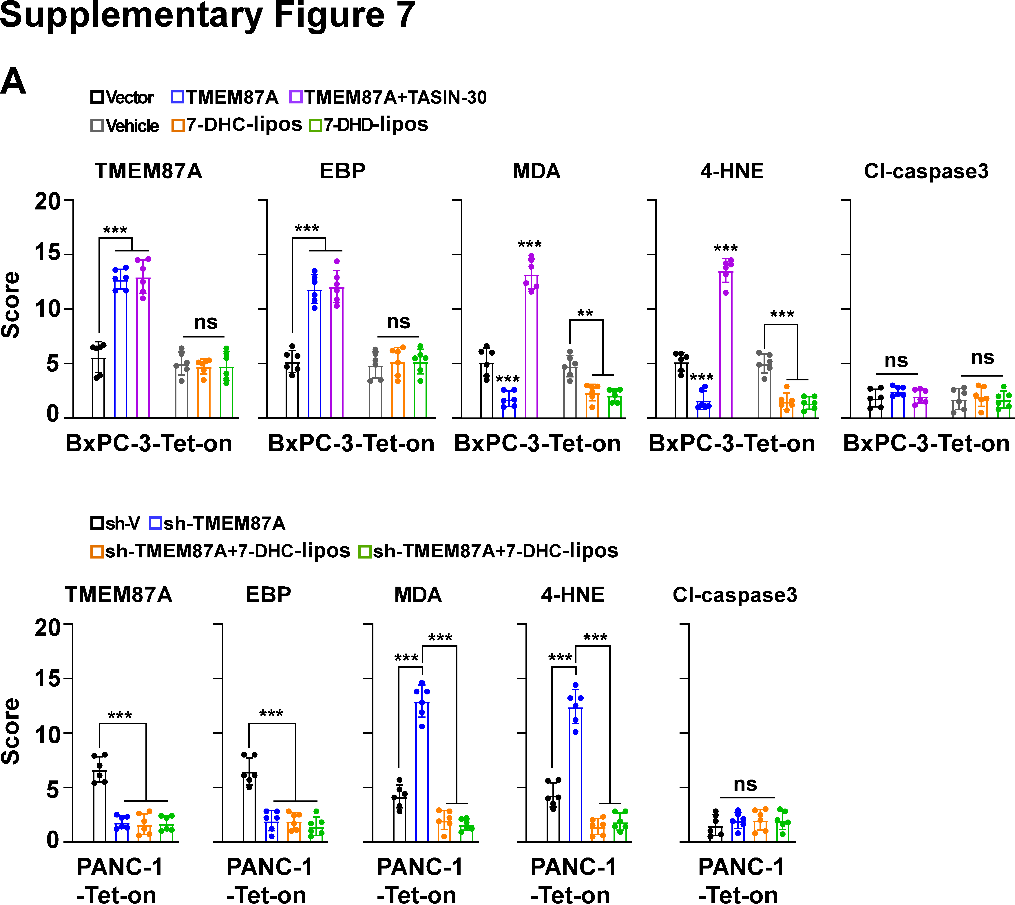


**Supplementary Fig. 7. EBP is Crucial for TMEM87A-Mediated Promotion of PDAC Progression.**

**(A)** Quantification of TMEM87A, EBP, 4-HNE, MDA, and cleaved caspase-3 staining in the indicated PDAC cells xenograft tumours with indicated treatments. Data are the mean ± SD of n = 6 (**A**) biologically independent samples (**p < 0.01, ***p < 0.001, ns, not significant.). Statistical analysis was performed using a two‐way ANOVA, followed by Tukey's test (**A**).

1. **Supplementary Tables**

**Supplementary Table 1. Correlation between TMEM87A expression and clinicopathologic characteristics of PDAC patients**

| **Characteristic** | **No. of cases** | **TMEM87A expression level** | | |
| --- | --- | --- | --- | --- |
| **low** | **high** | **p-value** |
| **Total cases** | **107** | **38** | **69** |  |
| **Gender** |  | | | |
| **Male**  **Female** | **62** | **20** | **42** | **0.409** |
| **45** | **18** | **27** |
| **Age** |  | | | |
| **≤60** | **46** | **19** | **27** | **0.277** |
| **＞60** | **61** | **19** | **42** |
| **Differentiation** |  | | | |
| **Poor** | **26** | **12** | **14** | **0.193** |
| **Moderate** | **53** | **14** | **39** |
| **Well** | **28** | **12** | **16** |
| **T stage** |  | | | |
| **T1-2** | **27** | **13** | **14** | **0.277** |
| **T3-4** | **80** | **25** | **55** |
| **Lymphatic metastasis** |  | | | |
| **Negative** | **49** | **21** | **28** | **0.145** |
| **Positive** | **58** | **17** | **41** |
| **TNM stage** |  | | | |
| **Stage Ⅰ** | **33** | **17** | **16** | **0.021** |
| **Stage Ⅱ** | **44** | **16** | **28** |
| **Stage Ⅲ** | **30** | **5** | **25** |
| **Vital Status** |  | | | |
| **Alive** | **34** | **21** | **13** | **<0.001** |
| **Death** | **73** | **17** | **56** |
| **Recurrence** |  | | | |
| **NO** | **27** | **14** | **13** | **<0.001** |
| **YES** | **80** | **24** | **56** |

**Supplementary Table 2. Univariate and multivariate analysis of different prognostic parameters in PDAC patients by Cox-regression analysis**

|  | **Univariate analysis** | | **Multivariate analysis** | |
| --- | --- | --- | --- | --- |
|  | **P** | **Hazard ratio**  **(95%CI)** | **P** | **Hazard ratio**  **(95%CI)** |
| **Gender** | **0.084** | **1.530**  **(0.944-2.480)** |  |  |
| **Age** | **0.242** | **1.322**  **(0.828-2.108)** |  |  |
| **Differentiation** | **0.356** | **1.286**  **(0.754-2.194)** |  |  |
| **T stage** | **0.103** | **0.659**  **(0.400-1.088)** |  |  |
| **Lymphatic metastasis** | **0.099** | **0.679**  **(0.428-1.075)** |  |  |
| **TNM stage** | **<0.001** | **0.189**  **(0.112-0.318)** | **<0.001** | **0.192**  **(0.105-0.351)** |
| **Recurrence** | **<0.001** | **27.714**  **(6.626-115.921)** | **<0.001** | **22.228**  **(5.035-98.133)** |
| **TMEM87A expression** | **0.015** | **1.887**  **(1.131-3.151)** | **<0.001** | **2.851**  **(1.600-5.079)** |

**Supplementary Table 3. Correlation between EBP expression and clinicopathologic characteristics of KRASmut-PDAC patients.**

| **Characteristic** | **No. of cases** | **EBP expression level** | | |
| --- | --- | --- | --- | --- |
| **low** | **high** | **p-value** |
| **Total cases** | **95** | **31** | **64** |  |
| **Gender** |  | | | |
| **Male**  **Female** | **55** | **14** | **41** | **0.08** |
| **40** | **17** | **23** |
| **Age** |  | | | |
| **≤60** | **38** | **12** | **26** | **0.858** |
| **＞60** | **57** | **19** | **38** |
| **Differentiation** |  | | | |
| **Poor** | **20** | **6** | **16** | **0.541** |
| **Moderate** | **54** | **20** | **34** |
| **Well** | **31** | **5** | **14** |
| **T stage** |  | | | |
| **T1-2** | **20** | **10** | **10** | **0.062** |
| **T3-4** | **75** | **21** | **54** |
| **Lymphatic metastasis** |  | | | |
| **Negative** | **45** | **20** | **25** | **0.146** |
| **Positive** | **50** | **11** | **39** |
| **TNM stage** |  | | | |
| **Stage Ⅰ** | **23** | **12** | **11** | **0.022** |
| **Stage Ⅱ** | **48** | **16** | **32** |
| **Stage Ⅲ** | **24** | **3** | **21** |
| **Vital Status** |  | | | |
| **Alive** | **29** | **17** | **12** | **<0.001** |
| **Death** | **66** | **14** | **52** |
| **Recurrence** |  | | | |
| **NO** | **23** | **12** | **11** | **0.022** |
| **YES** | **72** | **19** | **53** |

**Supplementary Table 4. Univariate and multivariate analysis of different prognostic parameters in KRASmut PDAC patients by Cox-regression analysis**

|  | **Univariate analysis** | | **Multivariate analysis** | |
| --- | --- | --- | --- | --- |
|  | **P** | **Hazard ratio**  **(95%CI)** | **P** | **Hazard ratio**  **(95%CI)** |
| **Gender** | **0.131** | **0.685**  **(0.420-1.119)** |  |  |
| **Age** | **0.728** | **1.092**  **(0.664-1.797)** |  |  |
| **Differentiation** | **0.09** | **1.613**  **(0.929-2.802)** |  |  |
| **T stage** | **0.655** | **0.878**  **(0.495-1.556)** |  |  |
| **Lymphatic metastasis** | **0.095** | **1.524**  **(0.930-2.498)** |  |  |
| **TNM stage** | **<0.001** | **4.251**  **(2.068-8.736)** | **0.002** | **3.352**  **(1.581-7.107)** |
| **recurrence** | **<0.001** | **17.789**  **(6.100-51.875)** | **<0.001** | **27.328**  **(7.863-94.984)** |
| **EBP expression** | **<0.001** | **3.170**  **(1.746-5.756)** | **<0.001** | **4.518**  **(2.315-8.818)** |

**Supplementary Table 5. Primers and Oligonucleotides used in this study**

| **Primer used for qPCR** | |
| --- | --- |
| TMEM87A-up | CCGTCACCACTGTCGTTTTTC |
| TMEM87A-dn | GGTATCGGAATGTGCCATTTGG |
| STAT3-up | TCTGGCATACTCATTC TGGTTTG |
| STAT3-dn | TCCATCGCTGACAAAAGCCC |
| EBP-up | CTCAGCACCTAAGACTGGACA |
| EBP-down | ACGACTAAGACCCCTGTGACA |
| **siRNA sequences** |  |
| si-MYC#1 | AGACCUUCAUCAAAAACAU |
| si-MYC#2 | GAGCUAAAACGGAGCUUUU |
| si-NRF2#1 | CCGGCATTTCACTAAACACAA |
| si-NRF2#2 | GAGACUACCAUGGUUCCAA |
| si-STAT3#1 | GCACAATCTACGAAGAATCAA |
| si-STAT3#2 | GCAACAGATTGCCTGCATTGG |
| si-JUN#1 | GGCACAGCTTAAACAGAAA |
| si-JUN#2 | GGGTGCCAACTCATGCTAA |
| si-ELK1#1 | GGCAATGGCCACATCATCT |
| si-ELK1#2 | GGCTACGCAAGAACAAGAC |
| si-GPX4#1 | GTGAGGCAAGACCGAAGTAAA |
| si-GPX4#2 | GTGGATGAAGATCCAACCCAA |
| si-FSP1#1 | AGATCAACAGCTCCGCCTA |
| si-FSP1#2 | CAGAATATCCTGAGAAAGA |
| si-GCH1#1 | GCGAGGATTGTAGAAATCTAT |
| si-GCH1#2 | CCATATTGGTTATCTTCCTAA |
| si-DHODH#1 | CAAGCTGTCATTAACAGGTAT |
| si-DHODH#2 | TCCGGGATTTATCAACTCAAA |
| si-TMEM87A#1 | CGCUGAUUGUUACAAUGAAAU |
| si-TMME87A#2 | CCAUGACUGUUGAAGUGAAGG |
| si-UBE2J1#1 | GCUCUUAUAUUCCGACGAAUA |
| si-UBE2J1#2 | GCUUUAAGGCAGAAGUCAAUU |
| si-RNF4#1 | ACCAACAUCUGAUAUGUAAACUCT |
| si-RNF4#2 | CCCUGAAGAAUGCUAAUACUUGCCC |
| si-RNF152#1 | CCAAGTTGCTGGACTGCAA |
| si-RNF152#2 | GCATCGTGCTTCACAACAT |
| si-TRIM67#1 | GTACCATCGACGGTCTTCA |
| si-TRIM67#2 | CCTCGTTGCTCAGTGTGAT |
| si-FBXL6#1 | CCUGCAACUUUGUGAGCAACG |
| si-FBXL6#2 | GGGUCAAGGCGGAGAAGAAGC |
| si-OPTN#1 | CAUGAAGCUAAAUAAUCAATT |
| si-OPTN#2 | GGAAUUAGCUGUGAGCCAATT |
| si-ZNF598#1 | UGACGAGCGCUACCUGGACAAUGA |
| si-ZNF598#2 | AUGGUCCUGUAAGCCAAGA |
| **shRNA target sequences** |  |
| TMEM87A-sh1 | GCAGTTAAAGATGGCTACCAT |
| TMEM87A-sh2 | CCAGACTGATCTTGCTTCCTT |

1. **Source Data Fig.1-6 and Supplementary Figure 1-6**


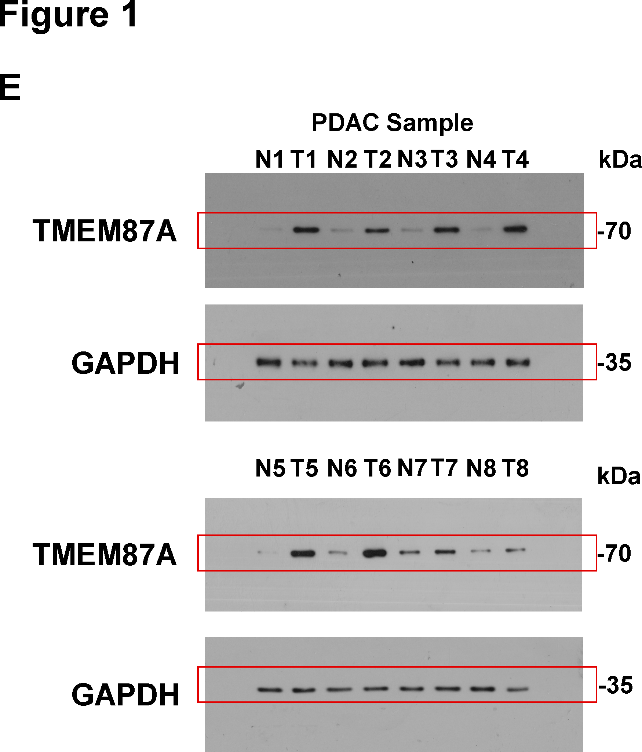


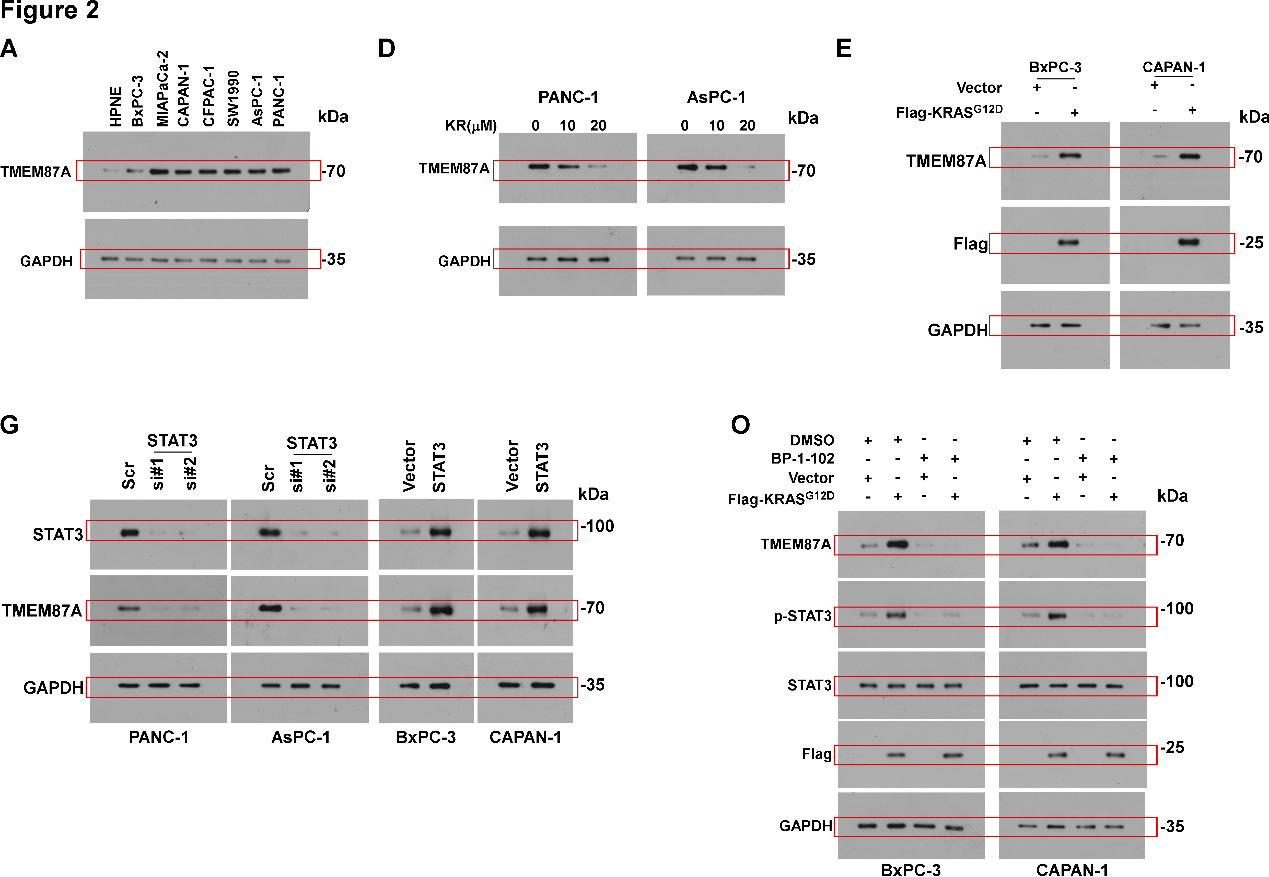


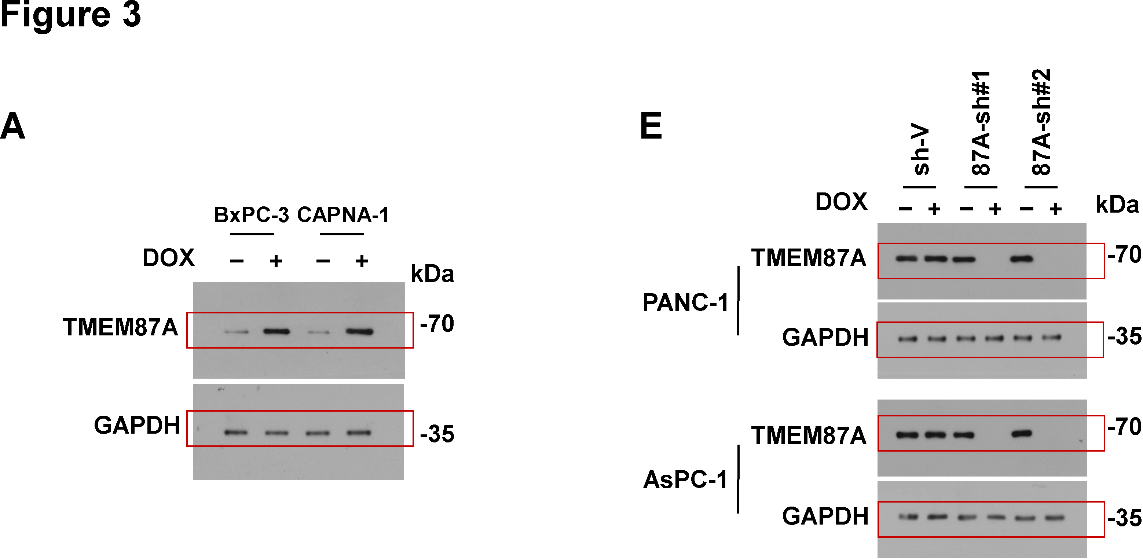


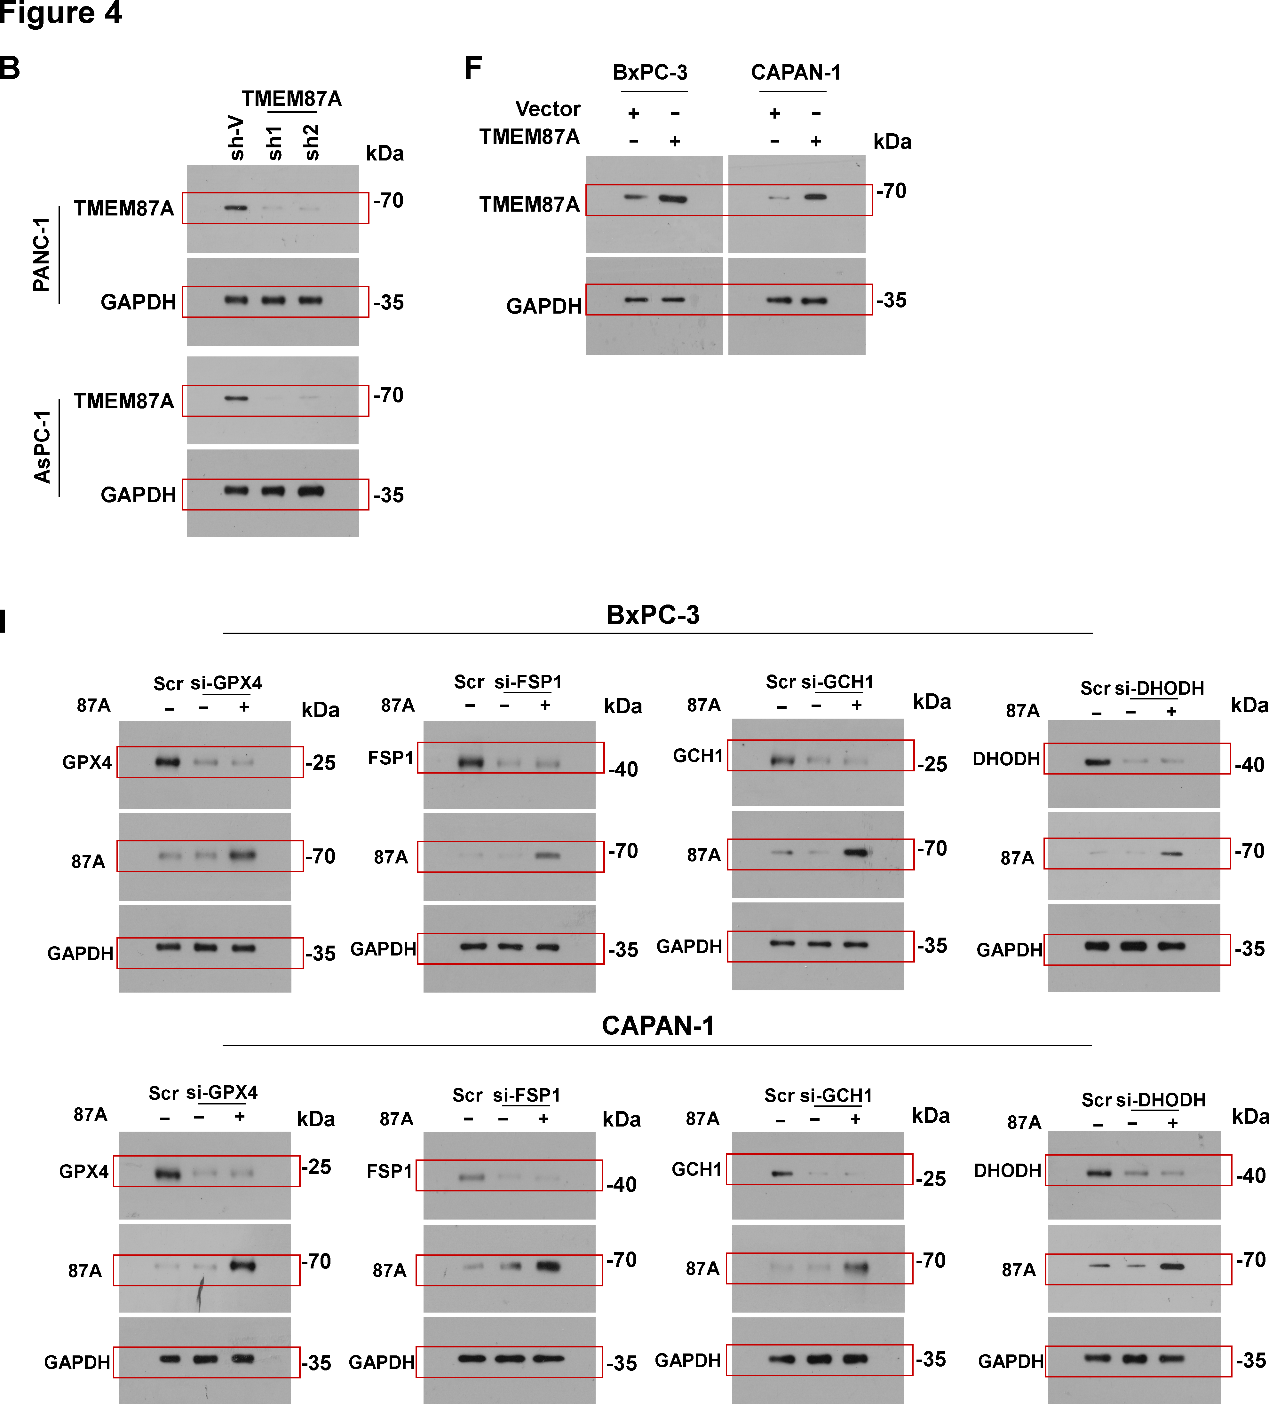


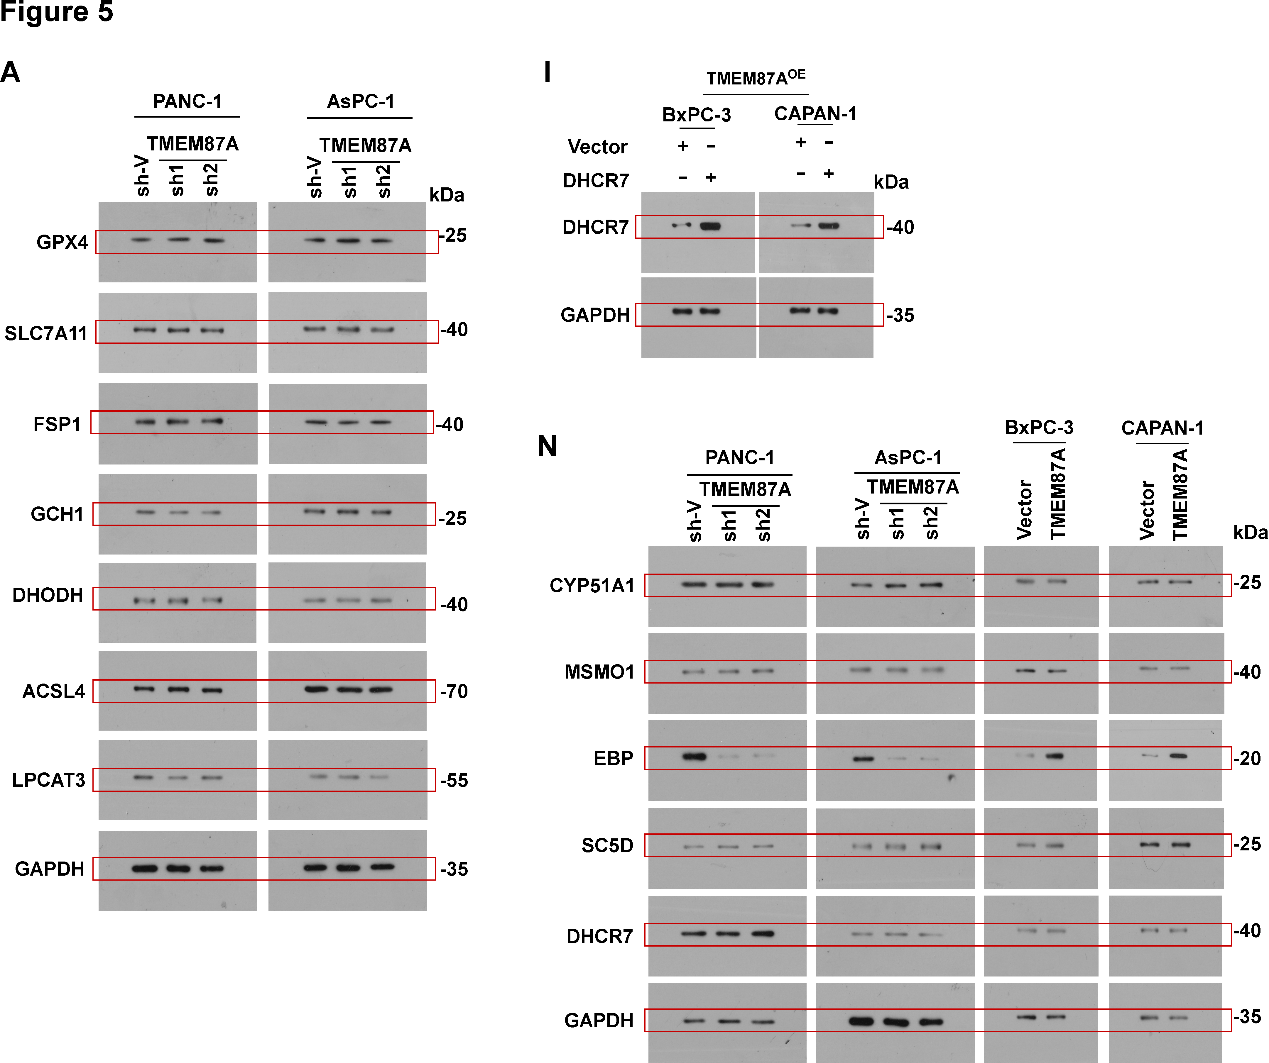


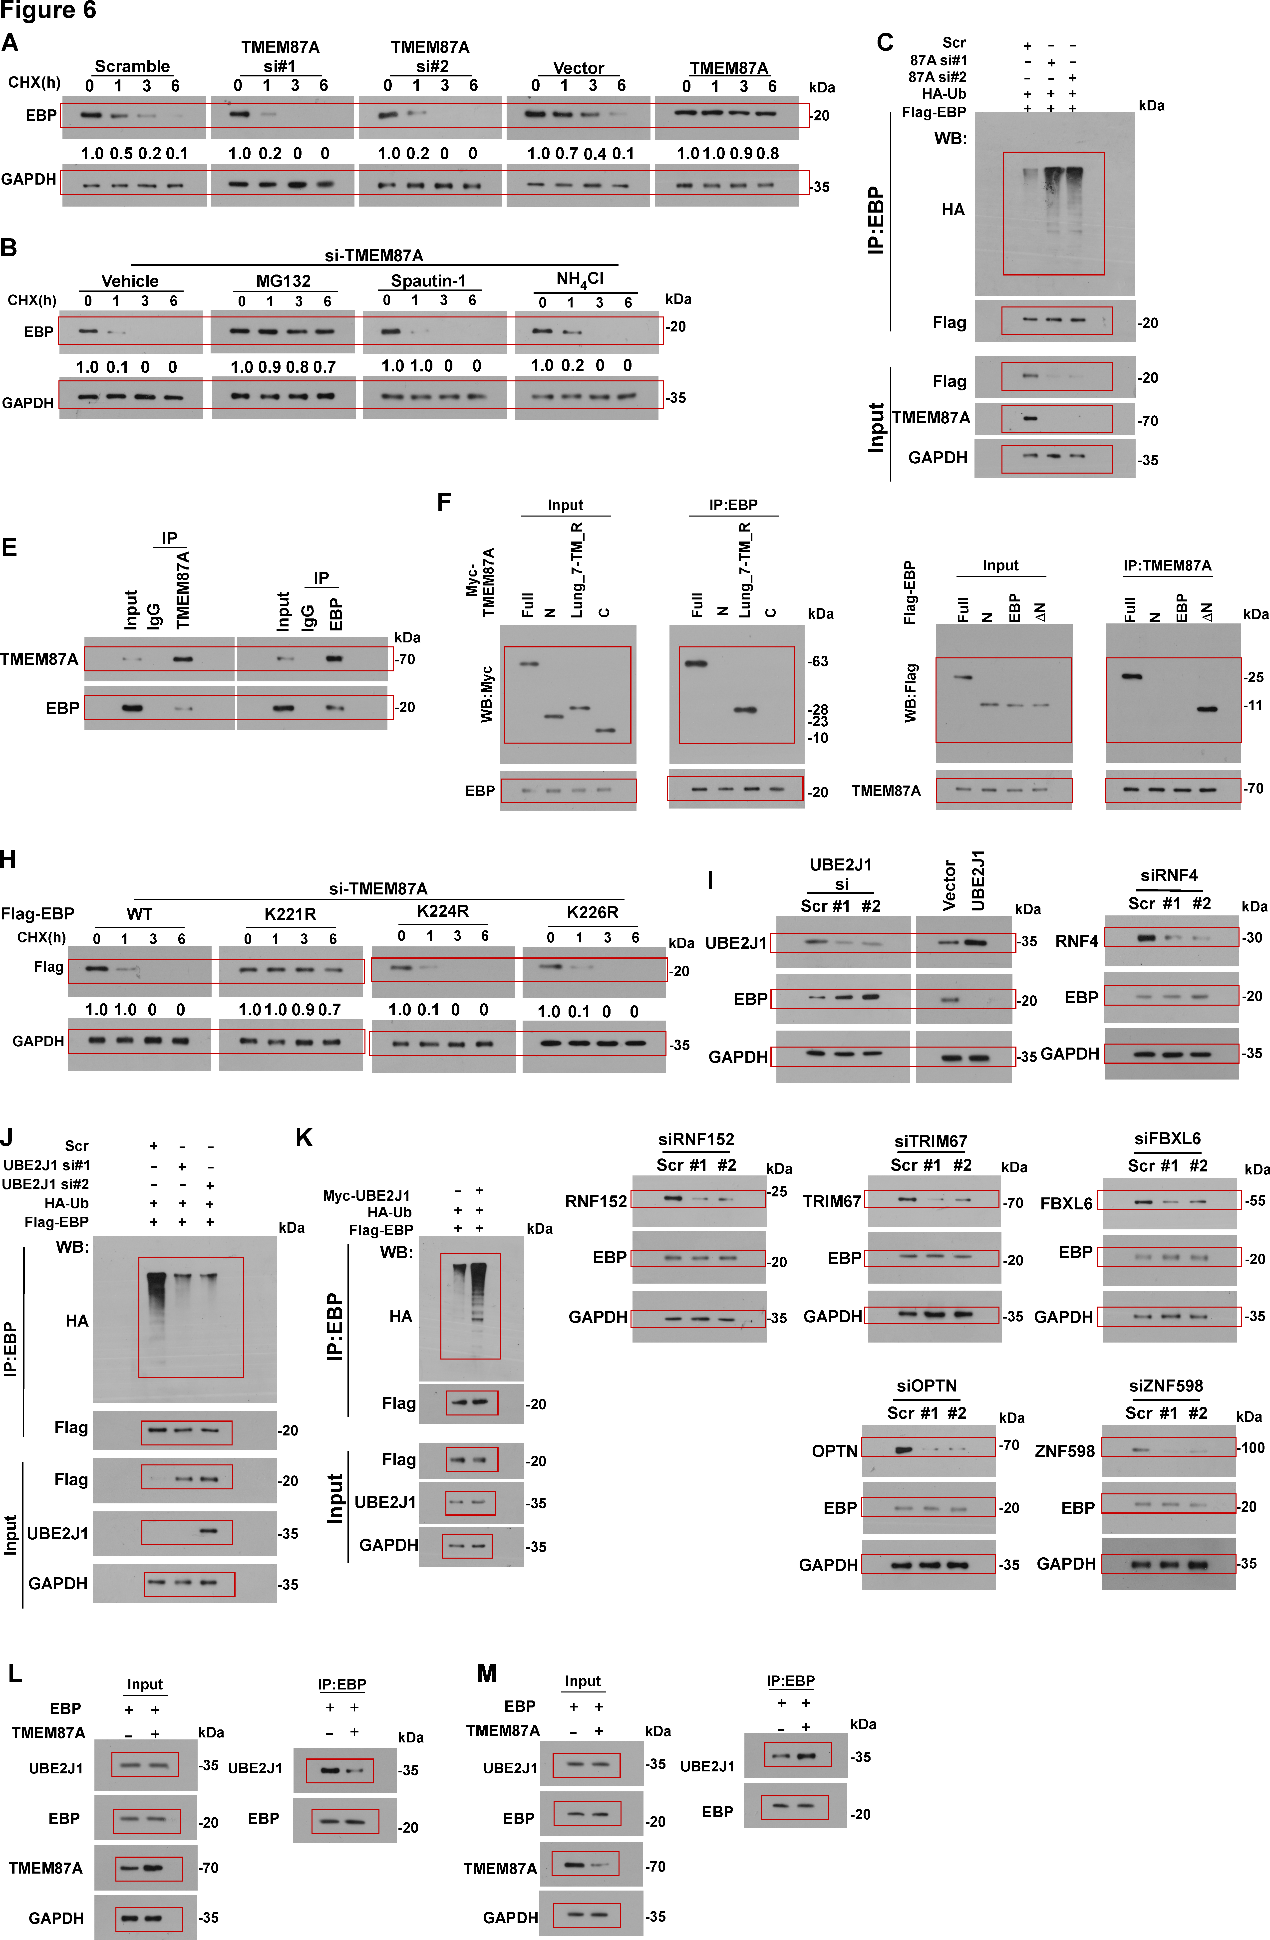


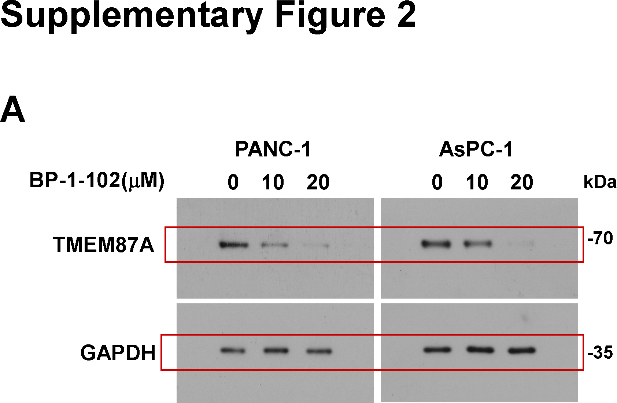


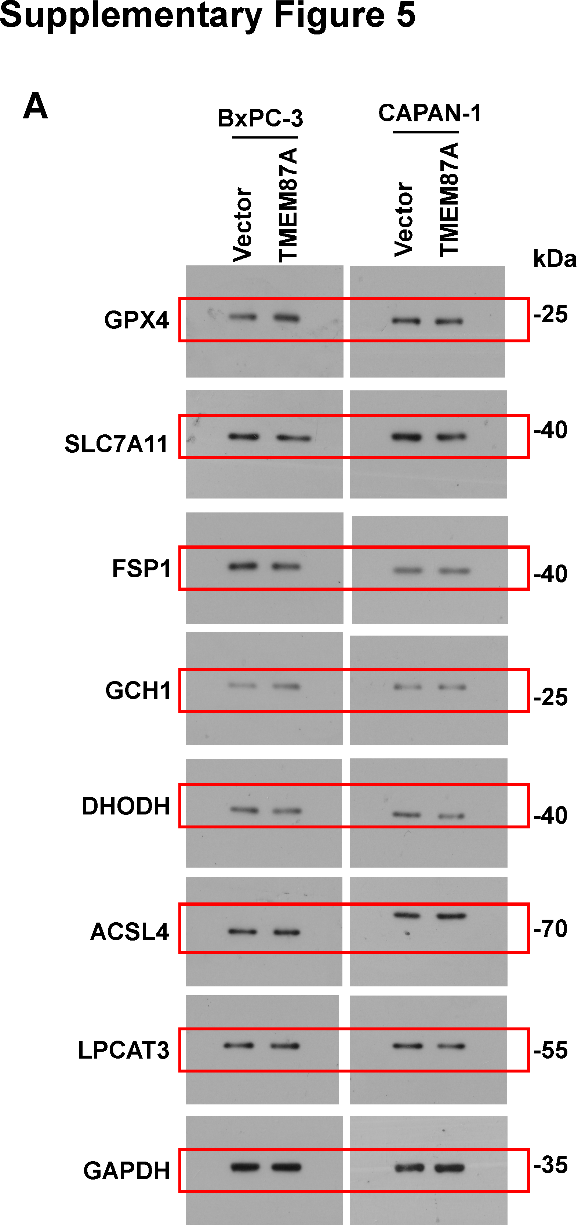


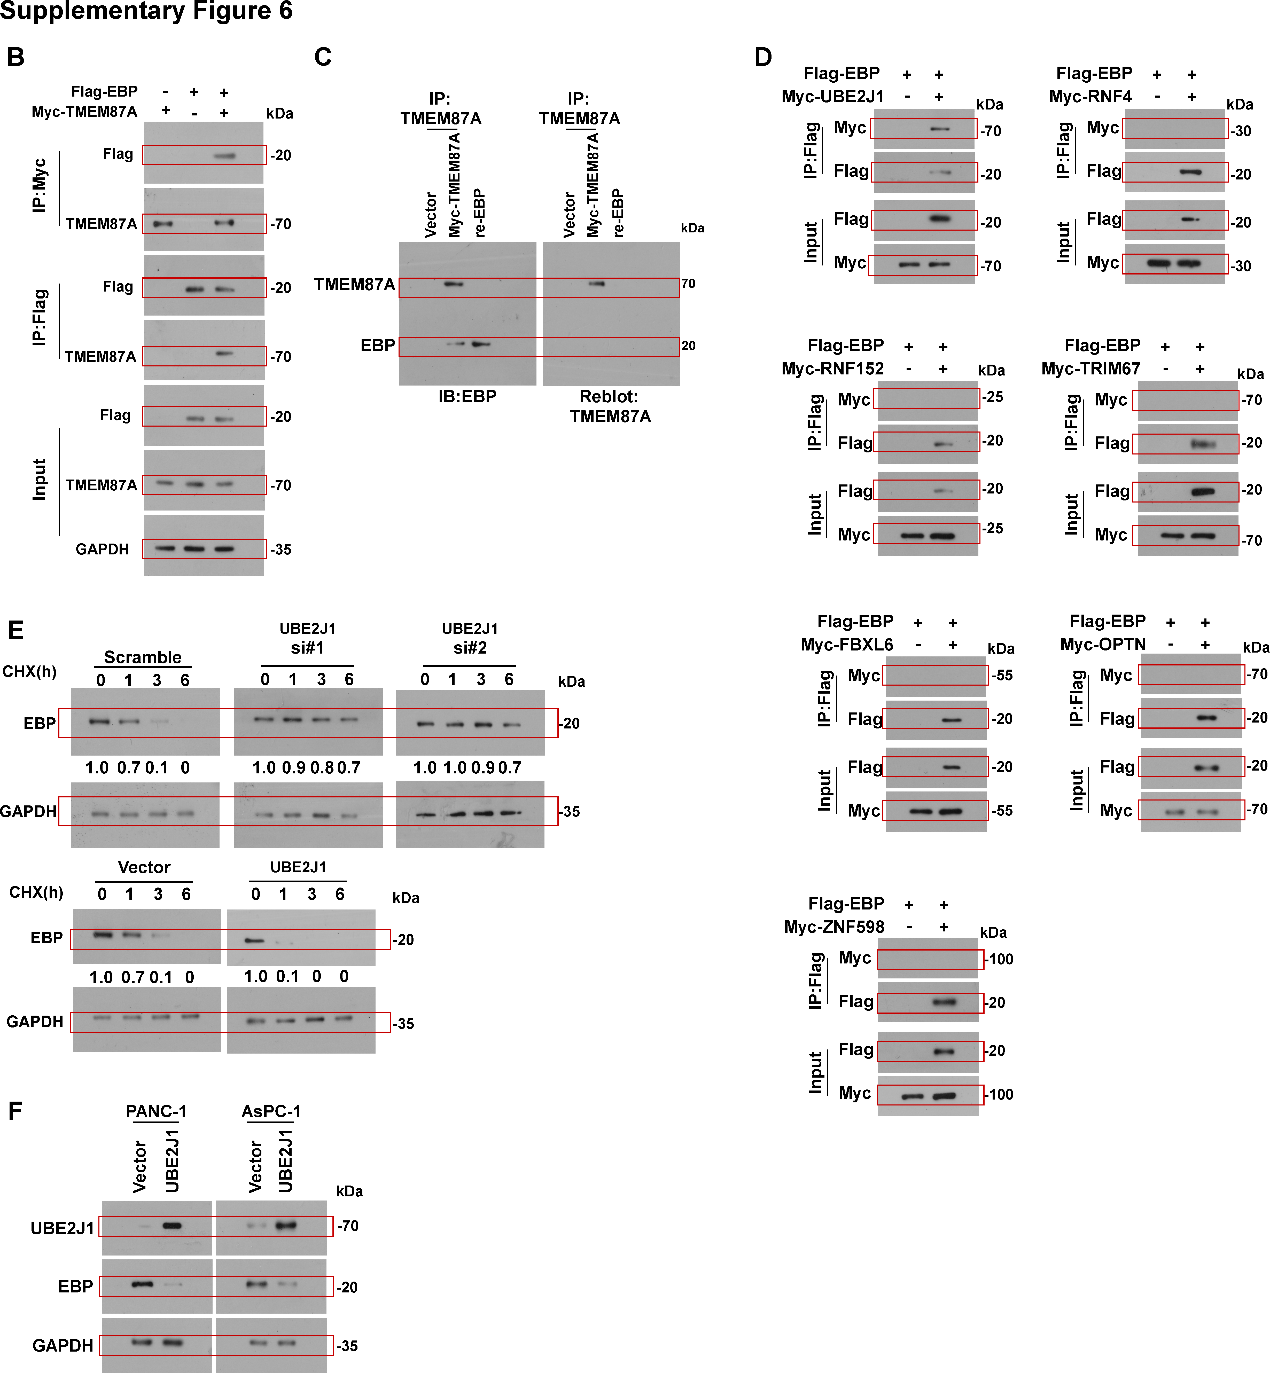

Supplement: Supplementary file 1 [file 0895cd3e494beecd27372e62.docx]
